# Supplementary material
Source: Research Square preprint supplement (doi:10.21203/rs.3.rs-9295991/v1)
Supplement: Supplementary file 1 [file 1c6dd07f02103f7ce94004ae.docx]

| **Doxycycline** | **Polymyxin** | **Gentamicin** | **Amikacin** | **Meropenem** |
| --- | --- | --- | --- | --- |
| 16 μg/mL | 4 μg/mL | 16 μg/mL | 64 μg/mL | 8 μg/mL |
| 8 μg/mL | 2 μg/mL | 8 μg/mL | 32 μg/mL | 4 μg/mL |
| 4 μg/mL | 1 μg/mL | 4 μg/mL | 16 μg/mL | 2 μg/mL |
| 2 μg/mL | 0.5 μg/mL | 2 μg/mL | 8 μg/mL | 1 μg/mL |
| 1 μg/mL | 0,25 μg/mL | 1 μg/mL | 4 μg/mL | 0.5 μg/mL |
| 0.5 μg/mL | 0.125 μg/mL | 0.5 μg/mL | 2 μg/mL | 0.25 μg/mL |

**Table 1.** Serial dilution concentrations used for antimicrobial susceptibility and synergy testing of Acinetobacter baumannii isolates. The table displays the concentration ranges (in µg/mL) of the five antibiotics tested: doxycycline, polymyxin B, gentamicin, amikacin, and meropenem. These serial two-fold dilutions were employed in checkerboard and MIC assays to evaluate planktonic and biofilm cell susceptibility. The concentrations ranged from 16 µg/mL to 0.25 µg/mL for most agents, with the highest concentrations at the top row and decreasing downward.

| **Isolate** | **Hospital** | **OXA-23** | **Infection Site** | **DOX (µg/mL)** | **AMK (µg/mL)** | **GEN (µg/mL)** | **POL (µg/mL)** | **MEM (µg/mL)** | **DOX+AMK (µg/mL)** | **DOX+GEN (µg/mL)** | **DOX+POL (µg/mL)** | **DOX+MEM (µg/mL)** |
| --- | --- | --- | --- | --- | --- | --- | --- | --- | --- | --- | --- | --- |
| 22 | HUC | YES | Secretion | 0,5 | 16 | 16 | 0,5 | 8 | Indifferent | Indifferent | Indifferent | Indifferent |
| 23 | HUC | YES | Secretion | 1 | 4 | 1 | 0,25 | 8 | Synergy | Synergy | Indifferent | Indifferent |
| 24 | HUC | YES | Blood | 1 | 16 | 2 | 0,5 | 8 | Synergy | Synergy | Indifferent | Indifferent |
| 25 | HUC | YES | Secretion | 16 | 64 | 16 | 0,25 | 8 | Indifferent | Indifferent | Indifferent | Indifferent |
| 26 | HUC | YES | Blood | 1 | 32 | 2 | 0,5 | 8 | Synergy | Indifferent | Indifferent | Indifferent |
| 27 | HUC | YES | Middle Ear Secretion | 1 | 16 | 4 | 0,25 | 8 | Indifferent | Synergy | Indifferent | Indifferent |
| 28 | HUC | YES | Abscess | 1 | 64 | 4 | 0,25 | 8 | Synergy | Indifferent | Indifferent | Indifferent |
| 30 | HUEM | YES | Blood | 16 | 64 | 16 | 0,25 | 8 | Indifferent | Indifferent | Indifferent | Indifferent |
| 31 | HUEM | YES | Sacral Ulcer Secretion | 0,25 | 64 | 16 | 0,25 | 8 | Indifferent | Indifferent | Indifferent | Indifferent |
| 32 | HUEM | YES | Ulcer Secretion | 0,25 | 64 | 8 | 0,25 | 8 | Indifferent | Indifferent | Indifferent | Indifferent |
| 33 | HUEM | YES | Tracheal Aspirate | 16 | 64 | 16 | 0,25 | 8 | Indifferent | Indifferent | Indifferent | Indifferent |
| 34 | HUEM | YES | Urine | 16 | 64 | 16 | 0,25 | 8 | Indifferent | Indifferent | Indifferent | Indifferent |
| 35 | HUEM | YES | Tracheal Aspirate | 8 | 64 | 16 | 0,5 | 8 | Indifferent | Indifferent | Indifferent | Indifferent |
| 36 | HUEM | YES | Urine | 16 | 64 | 16 | 0,25 | 8 | Indifferent | Indifferent | Indifferent | Indifferent |
| 37 | HUEM | YES | Blood | 0,25 | 32 | 8 | 0,5 | 8 | Indifferent | Indifferent | Indifferent | Indifferent |
| 38 | HUEM | YES | Tracheal Aspirate | 16 | 64 | 16 | 0,25 | 8 | Indifferent | Indifferent | Indifferent | Indifferent |
| 39 | HUEM | YES | Tracheal Aspirate | 16 | 64 | 16 | 0,25 | 8 | Indifferent | Indifferent | Indifferent | Indifferent |
| 40 | HUEM | YES | Tracheal Aspirate | 16 | 64 | 16 | 0,25 | 8 | Indifferent | Indifferent | Indifferent | Indifferent |
| 41 | HUEM | YES | Tracheal Aspirate | 0,5 | 32 | 16 | 0,25 | 8 | Indifferent | Indifferent | Indifferent | Indifferent |
| 42 | HUEM | YES | Tracheal Aspirate | 16 | 64 | 16 | 0,125 | 8 | Indifferent | Indifferent | Indifferent | Indifferent |

**Table 2.** Antimicrobial susceptibility and synergy profile of Acinetobacter baumannii clinical isolates from two hospitals. The table presents the minimum inhibitory concentrations (MICs, in µg/mL) for doxycycline (DOX), amikacin (AMK), gentamicin (GEN), polymyxin B (POL), and meropenem (MEM) across 20 clinical isolates. All isolates were positive for the blaOXA-23 gene, indicating resistance to carbapenems. The samples were obtained from various infection sites including blood, tracheal aspirate, ulcers, and secretions. MIC values are followed by the result of combination testing of doxycycline with AMK, GEN, POL, and MEM, determined via checkerboard assay. Outcomes are classified as “Synergy” for a synergistic effect and “Indifferent” when no significant interaction was observed. The results highlight varying responses to antibiotic combinations, with some strains showing favorable synergy, particularly with doxycycline and gentamicin.
