# Supplementary material
Source: Research Square preprint supplement (doi:10.21203/rs.3.rs-9295991/v1)
Supplement: Supplementary file 2 [file a7860ba9f0d9e085c4372187.docx]

**Supplementary material**

**
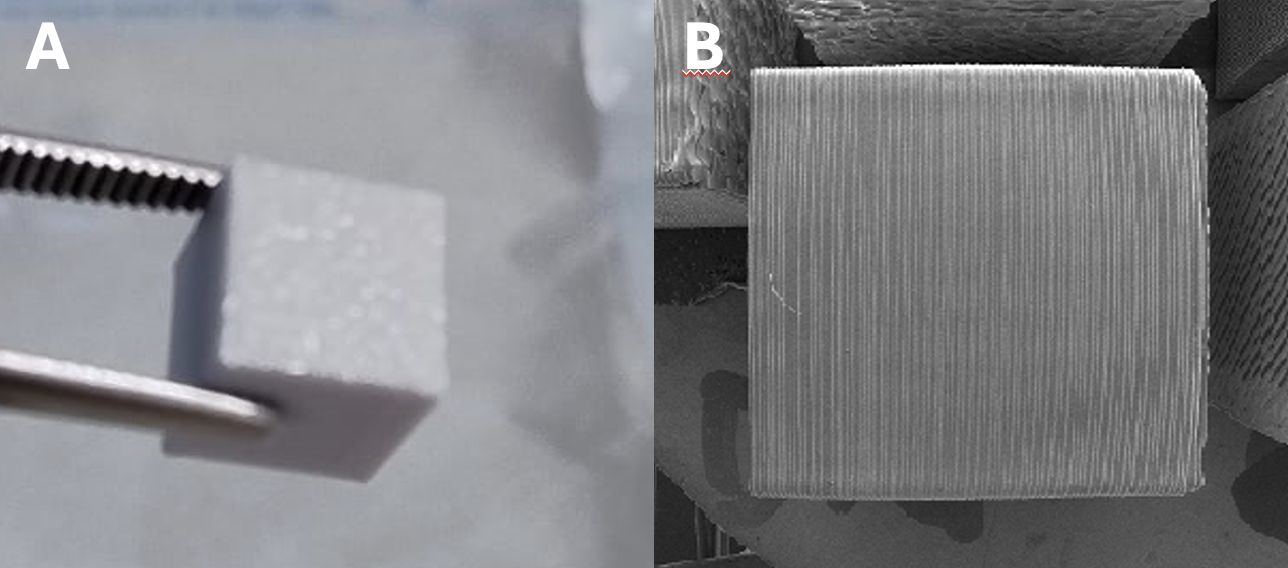
**

**Figure S1**: Representative image of the polyurethane printed model for biofilm tests with *A. baumannii*

**Figure FTIR (S2):**

**
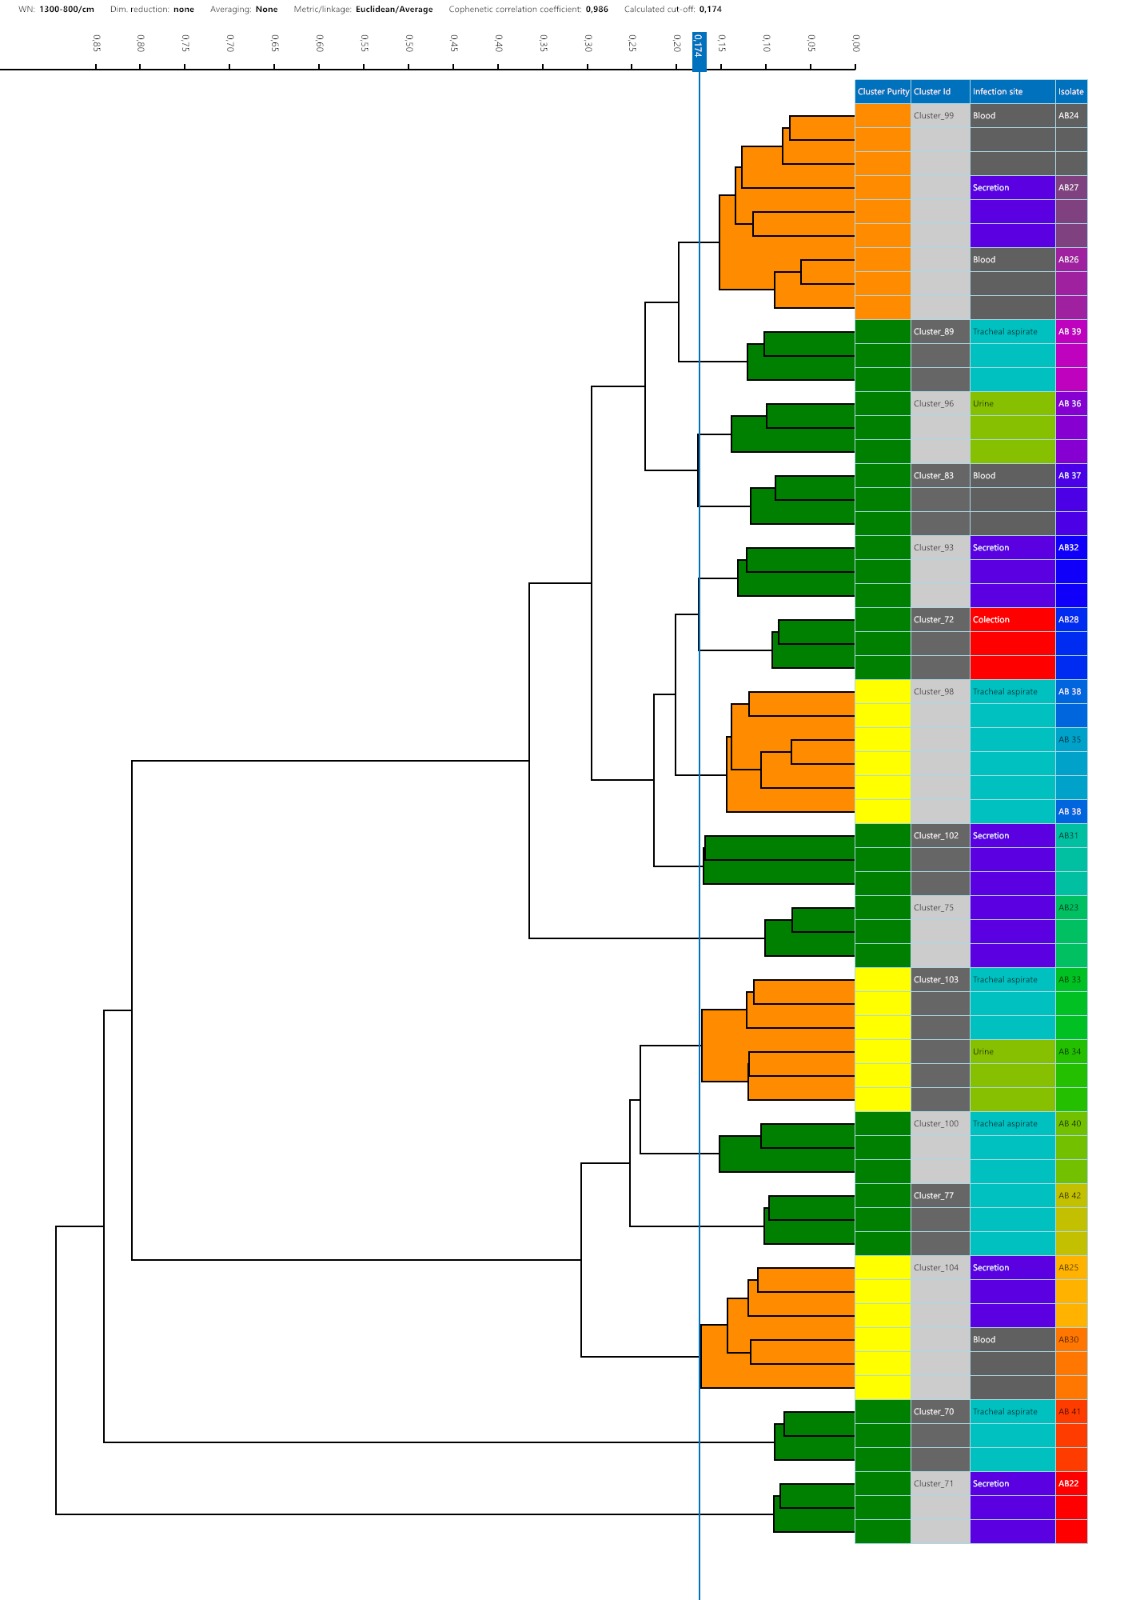
**

**Figure FTIR**: Hierarchical dendrogram representation of *A. baumannii* clones generated by Fourier-Transform Infrared Spectroscopy (FT-IR) using the IR Biotyper (Bruker, Bremen, Germany).

**
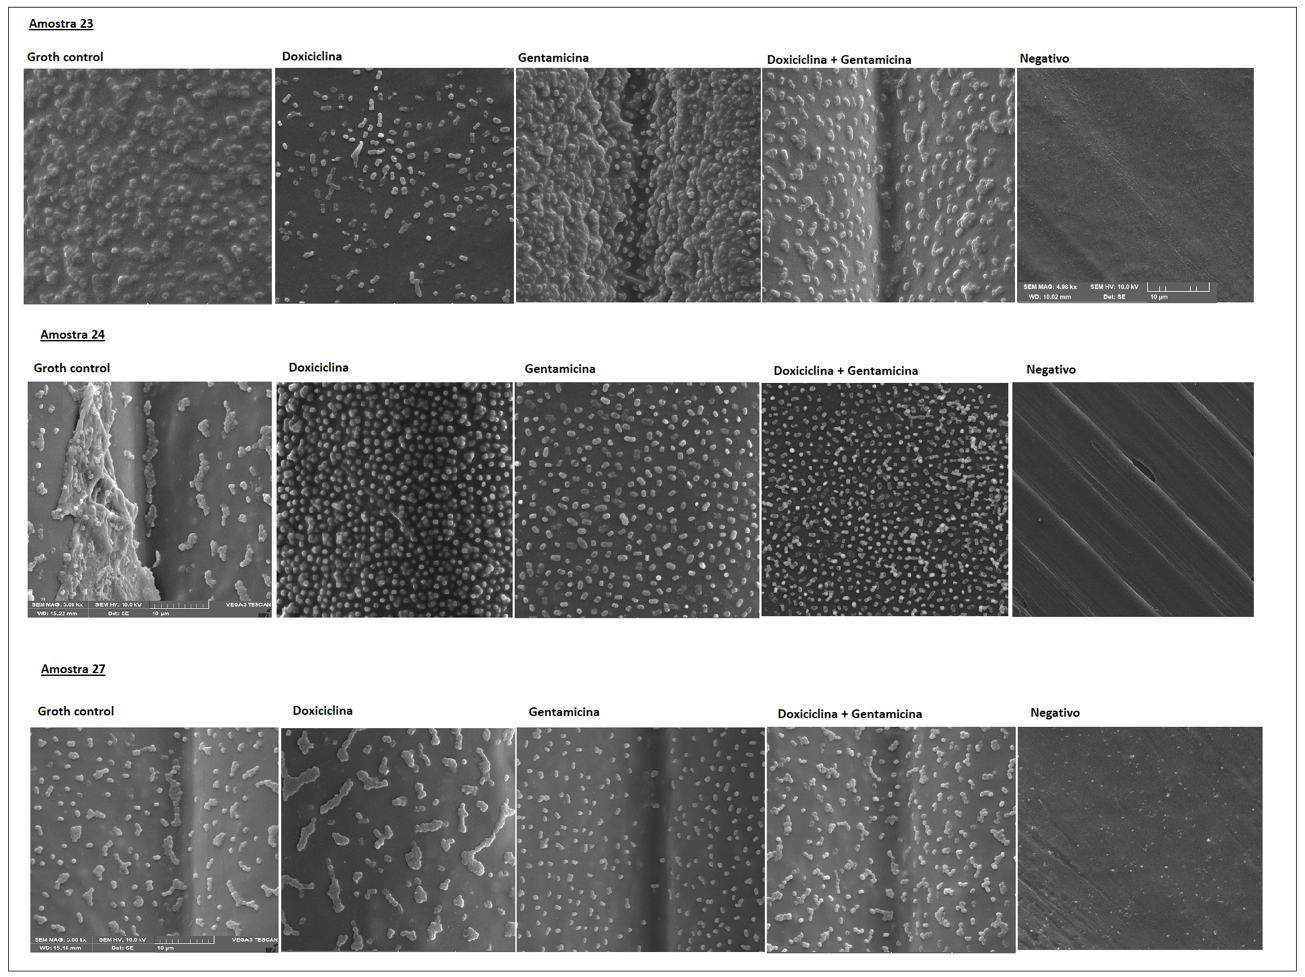
**

**Figure SEM**: Scanning electron microscopy of biofilm formation on polyurethane in presence of antibiotics.
